# Supplementary material for: Au@In2O3 core–shell composites: a metal–semiconductor heterostructure for gas sensing applications
Source: Royal Society of Chemistry journal article supplement (doi:10.1039/c4ra12467g), 2014-11-25
Supplement: c4ra12467g1.pdf [file c4ra12467g1.pdf]

## Au@In<sub>2</sub>O<sub>3</sub> core-shell composites: metal-semiconductor heterostructure for gas sensing applications

Xiaowei Li, Jiangyang Liu, Hang Guo, Xin Zhou, Chen Wang, Peng Sun,\* Xiaolong Hu, and  
Geyu Lu\*

State Key Laboratory on Integrated Optoelectronics, College of Electronic Science and

Engineering, Jilin University, Changchun, 130012, People's Republic of China. Fax: +86 431

85167808; Tel: +86 431 85167808; E-mail: spmaster2008@163.com, luyg@jlu.edu.cn

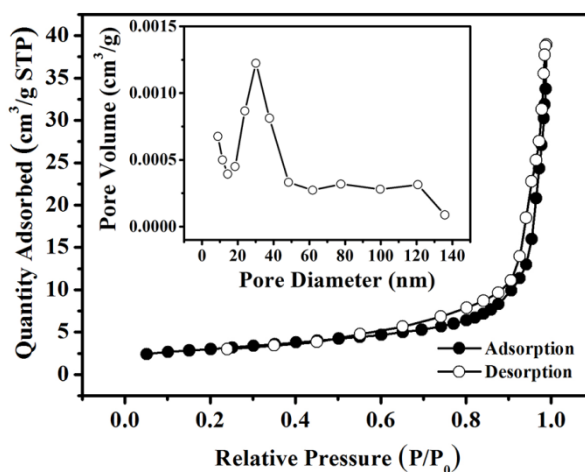

Fig. S1† The N<sub>2</sub> adsorption-desorption isotherms and corresponding pore size distribution curve (inset) of Au@In<sub>2</sub>O<sub>3</sub> composites.

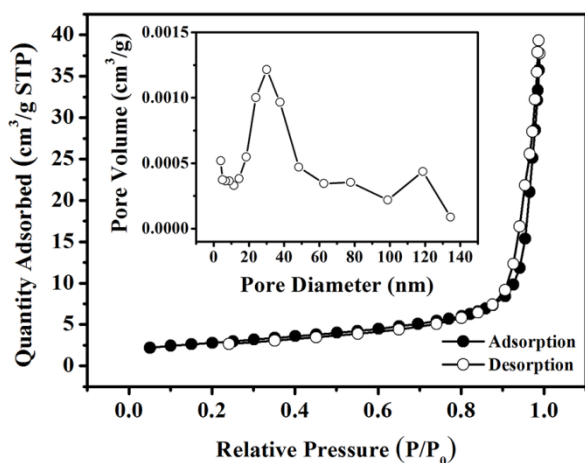

Fig. S2† The N<sub>2</sub> adsorption-desorption isotherms and corresponding pore size distribution curve (inset) of pure In<sub>2</sub>O<sub>3</sub> sample.

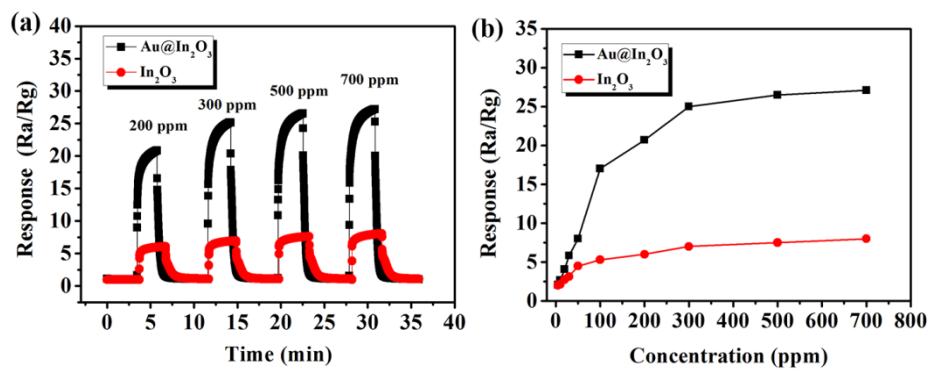

Fig. S3† (a) Response curves of the sensors when orderly exposed to high-concentration HCHO (b) Response of the sensors versus the varying formaldehyde concentration.

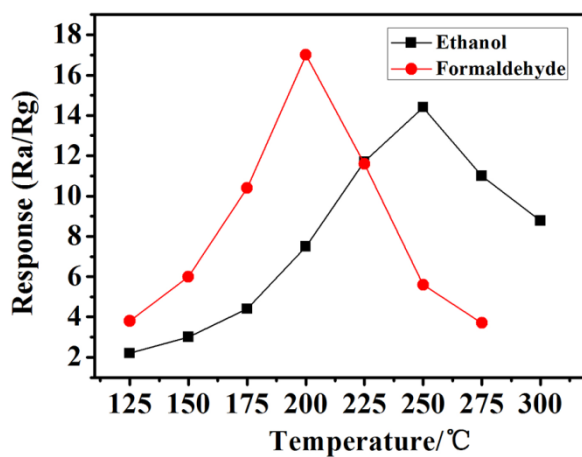

Fig. S4† Responses of the sensor to 100 ppm formaldehyde and ethanol as a function of operating temperature.
